# Supplementary material for: The Caenorhabditis elegans JNK Signaling Pathway Activates Expression of Stress Response Genes by Derepressing the Fos/HDAC Repressor Complex
Source: PLoS Genet. 2013 Feb 21;9(2):e1003315. doi: 10.1371/journal.pgen.1003315 (PMC3578760; doi:10.1371/journal.pgen.1003315)
Supplement: Table S6 — List of genes whose basal expression was decreased or not changed in kgb-1 mutants versus wild-type animals. Among the 66 genes listed in Table S5, we identified 50 genes whose basal expression was decreased or not changed in kgb-1 mutants versus wild-type animals. (XLSX) [file pgen.1003315.s015.xlsx]

## Sheet: Sheet1
Table S6. List of genes whose basal expression was decreased or not changed in kgb-1 mutants versus wild-type animals.
Probe Set ID	Gene Title	Probe ID	Gene Symbol	Representative Public ID	UniGene ID	Entrez Gene
180642_at	hypothetical protein /// status:Confirmed	Celegans _08923	F53A9.2 /// WBGene00018725	F53A9.2	Cel.23764	186143
184851_at	hypothetical protein /// status:Predicted	Celegans _13132	T28A11.4 /// WBGene00020871	T28A11.4	Cel.27884	189011
188934_at	UDP-GlucuronosylTransferase /// locus:ugt-13	Celegans _17215	ugt-13 /// WBGene00019232	H23N18.1	Cel.3228	186766
172627_x_at	status:Predicted /// hypothetical protein /// hypothetical protein	Celegans _00908	WBGene00013636 /// Y105C5A.12 /// Y105C5A.13	Y105C5A.13	Cel.23444	178441 /// 190877
182428_s_at	LYSozyme /// locus:lys-3	Celegans _10709	lys-3 /// WBGene00003092	Y22F5A.6	Cel.1915	179430
179422_s_at	hypothetical protein /// status:Partially_confirmed	Celegans _07703	M04C3.2 /// WBGene00010851	M04C3.2	Cel.34233	180274
180661_at	hypothetical protein /// status:Confirmed	Celegans _08942	W04E12.4 /// WBGene00012249	W04E12.4	Cel.2023	189191
183728_at	Neuropeptide-Like Protein /// locus:nlp-24	Celegans _12009	nlp-24 /// WBGene00003762	F35B12.7	Cel.3761	179594
182465_at	status:Partially_confirmed /// hypothetical protein	Celegans _10746	WBGene00012451 /// Y17D7B.3	Y17D7B.3	Cel.1944	189447
182815_at	hypothetical protein /// status:Confirmed	Celegans _11096	T24C4.4 /// WBGene00020760	T24C4.4	Cel.27808	188845
172035_x_at	Nuclear Hormone Receptor family	Celegans _00316	nhr-50	10198019	Cel.17991	180067
176662_at	---	Celegans _04943	---	Y71H2AM.H	---	---
185657_at	hypothetical protein /// status:Partially_confirmed	Celegans _13938	C14C6.12 /// WBGene00015763	C14C6.12	Cel.4769	182606
179305_at	status:Partially_confirmed /// hypothetical protein	Celegans _07586	WBGene00013975 /// ZK455.5	ZK455.5	Cel.9224	191321
184313_s_at	hypothetical protein /// status:Partially_confirmed	Celegans _12594	K11H12.4 /// WBGene00019660	K11H12.4	Cel.12603	176894
179162_at	Serpentine Receptor, class W /// locus:srw-51	Celegans _07443	srw-51 /// WBGene00005798	F40D4.8	Cel.29360	185526
179038_at	hypothetical protein /// status:Partially_confirmed	Celegans _07319	F26A3.5 /// WBGene00009143	F26A3.5	Cel.18878	184954
188615_s_at	COLlagen /// locus:col-72	Celegans _16896	col-72 /// WBGene00000648	W09G10.1	Cel.14182	173698
180296_at	status:Partially_confirmed /// hypothetical protein	Celegans _08577	WBGene00012500 /// Y26D4A.2	Y26D4A.2	Cel.16520	173178
174960_at	COLlagen /// locus:col-97	Celegans _03241	col-97 /// WBGene00000672	CEK120B8R	Cel.9507	176721
173497_s_at	status:Confirmed /// hypothetical protein	Celegans _01778	WBGene00022541 /// ZC190.7	C69167	Cel.6108	179250
174228_at	hypothetical protein /// status:Partially_confirmed	Celegans _02509	K08C7.4 /// WBGene00010647	C29568	Cel.6722	177957
172632_x_at	locus:nspe-4 /// hypothetical protein	Celegans _00913	WBGene00012589 /// Y38E10A.11	Y38E10A.11	Cel.14106	189658
179457_at	hypothetical protein /// status:Confirmed	Celegans _07738	B0024.4 /// WBGene00007097	B0024.4	Cel.9471	179432
185145_at	status:Partially_confirmed /// hypothetical protein	Celegans _13426	WBGene00021590 /// Y46D2A.2	Y46D2A.2	Cel.24132	189952
186390_at	status:Partially_confirmed /// hypothetical protein	Celegans _14671	WBGene00012961 /// Y47H10A.5	Y47H10A.5	Cel.16434	173091
192165_s_at	hypothetical protein /// serine/threonine-protein kinase	Celegans _20446	K11C4.1 /// WBGene00019642	K11C4.1	Cel.3020	179078
175554_s_at	hypothetical protein /// status:Confirmed	Celegans _03835	K02G10.3 /// WBGene00019345	AU113674	Cel.6106	180740
179814_at	Serpentine Receptor, class TX /// locus:srtx-1	Celegans _08095	srtx-1 /// WBGene00015214	B0496.5	Cel.13645	182008
189358_at	hypothetical protein /// glycogenin like	Celegans _17639	T10B10.8 /// WBGene00011684	T10B10.8	Cel.36524	188365
183324_at	hypothetical protein /// status:Partially_confirmed	Celegans _11605	K10D11.5 /// WBGene00010749	K10D11.5	Cel.12607	187270
180749_at	hypothetical protein /// status:Partially_confirmed	Celegans _09030	F22F7.4 /// WBGene00017722	F22F7.4	Cel.26561	184863
179587_at	hypothetical protein /// status:Partially_confirmed	Celegans _07868	F44F4.3 /// WBGene00009702	F44F4.3	Cel.15110	185749
185887_at	status:Predicted /// hypothetical protein	Celegans _14168	WBGene00022315 /// Y81B9A.1	Y81B9A.1	Cel.33153	190744
177913_at	Serpentine Receptor, class H /// locus:srh-216	Celegans _06194	srh-216 /// WBGene00005426	T20B3.5	Cel.27743	188622
184107_at	hypothetical protein /// status:Confirmed	Celegans _12388	K09D9.1 /// WBGene00019564	K09D9.1	Cel.3050	187208
176304_at	status:Confirmed /// hypothetical protein	Celegans _04585	WBGene00021796 /// Y52E8A.3	Y52E8A.3	Cel.13961	190187
184870_s_at	status:Partially_confirmed /// hypothetical protein	Celegans _13151	WBGene00013290 /// Y57G11A.2	Y57G11A.2	Cel.11890	178389
181223_at	Nematode AStacin protease /// locus:nas-8	Celegans _09504	nas-8 /// WBGene00003527	C34D4.9	Cel.20243	183207
183876_at	hypothetical protein /// status:Partially_confirmed	Celegans _12157	C07G3.2 /// WBGene00015574	C07G3.2	Cel.36741	182379
186820_at	hypothetical protein /// status:Partially_confirmed	Celegans _15101	E02C12.12 /// WBGene00017097	E02C12.12	Cel.4275	183991
191038_at	TetraSPanin family /// locus:tsp-1	Celegans _19319	tsp-1 /// WBGene00006627	C02F5.8	Cel.9955	192096
183963_at	hypothetical protein /// status:Confirmed	Celegans _12244	C29F9.2 /// WBGene00016217	C29F9.2	Cel.19443	175179
171795_x_at	hypothetical protein /// status:Confirmed	Celegans _00076	R12E2.14 /// WBGene00020039	C71115	Cel.143	172001
176256_s_at	status:Partially_confirmed /// hypothetical protein	Celegans _04537	WBGene00021978 /// Y58A7A.4	Y58A7A.4	Cel.33060	3565089
180453_at	hypothetical protein /// status:Confirmed	Celegans _08734	F53A9.1 /// WBGene00018724	F53A9.1	Cel.23763	186142
185253_at	hypothetical protein /// status:Confirmed	Celegans _13534	C37C3.10 /// WBGene00016502	C37C3.10	Cel.4564	183290
183069_at	Serpentine Receptor, class H /// locus:srh-296	Celegans _11350	srh-296 /// WBGene00005500	Y94A7B.4	Cel.28479	190793
184650_at	F-box A protein /// locus:fbxa-160	Celegans _12931	fbxa-160 /// WBGene00015604	C08E3.12	Cel.32816	182404
179353_at	status:Confirmed /// hypothetical protein	Celegans _07634	WBGene00013999 /// ZK550.5	ZK550.5	Cel.11605	191350
